# Supplementary material for: Ethological principles predict the neuropeptides co-opted to influence parenting
Source: PubMed Central journal article supplement (PMC5296637; doi:10.1038/ncomms14225), 2017-02-01
Supplement: ncomms14225-s1.pdf [file ncomms14225-s1.pdf]

**Supplementary Table 1. Individual peptides with observed modifications and their associated neuropeptides.**

| Neuropeptide gene                       | Peptide                                                                                                                                                                                                                                                                                                                                          | Possible modifications observed                                                                                                                                                                                                                                                                        | Test of difference in neuropeptide abundances |
|-----------------------------------------|--------------------------------------------------------------------------------------------------------------------------------------------------------------------------------------------------------------------------------------------------------------------------------------------------------------------------------------------------|--------------------------------------------------------------------------------------------------------------------------------------------------------------------------------------------------------------------------------------------------------------------------------------------------------|-----------------------------------------------|
| <i>Apis</i> -ITG-like (ITG)             | AGEKRLTGLAAFKRPMH<br>ALLAICLLGRQTEAWGGL<br>ANMGYG<br>LTGLAAFKRPM<br>TCLFAYGRRVGELCRRDSDCESGLVC<br>VCTESEQTSSSRICR                                                                                                                                                                                                                                | N terminus acetylation;<br>Oxidation;<br>C terminus amidation<br>N terminus acetylation<br>N terminus acetylation<br>Oxidation<br>C terminus amidation                                                                                                                                                 | $F_{2,9} = 2.826, P = 0.11$                   |
| <i>Apis</i> -NVP-like (NVP)             | APVNAESHGESRPT<br>APVNAESHGESRPTA<br>APVNAESHGESRPTAV<br>FAALALALPASVVEDVKSSDIKNSKVKRAP<br>FLNGPTRNNYYTLSELLGAAQQEQNVPLYQRYVL<br>LPASVVEDVKSSD<br>LPASVVEDVKSSDIKN<br>LPASVVEDVKSSDIKNS<br>LPASVVEDVKSSDIKNSKV<br>LPASVVEDVKSSDIKNSKVKRAPVN<br>NAQKTRMDNRYKREVD<br><br>PLYTSEDE<br>PTRNNYYTLSELLGAAQQEQNVPLYQRYVL<br>SNDPTREI<br>SPLYTSEDELGNDKT | C terminus amidation<br>C terminus amidation<br>C terminus amidation<br>C terminus amidation<br><br>C terminus amidation<br>C terminus amidation<br>C terminus amidation<br>N terminus acetylation; C terminus amidation<br>N terminus acetylation<br><br>N terminus acetylation; C terminus amidation | $F_{2,9} = 4.210, P = 0.05$                   |
| Crustean cardioactive peptide (CCAP)    | ANGYEGRDSIIDPK<br>FAFLVIDTESIFLPKRANGYE<br>FAFLVIDTESIFLPKRANGYEGRDSIIDP<br>SMQGDND                                                                                                                                                                                                                                                              | C terminus amidation<br>C terminus amidation<br>Oxidation                                                                                                                                                                                                                                              | $F_{2,9} = 5.380, P = 0.029$                  |
| Diuretic hormone 31 (DH <sub>31</sub> ) | APHNSRYMGYYGSNQDGGQNPYLLQTLARIRQAIIEEDLENS<br>GLDLGLGRGFSGSQAA<br>GLDLGLGRGFSGSQAAKH<br>GLDLGLGRGFSGSQAAKHLM<br>GLDLGLGRGFSGSQAAKHLMGLAAANFAGGP<br><br>GLDLGLGRGFSGSQAAKHLMGLAAANFAGGP<br>LDLGLGRGFSGSQAAKHLMGLAAANFAGGP                                                                                                                         | C terminus amidation<br>Oxidation; C terminus amidation<br>C terminus amidation<br>N terminus acetylation;<br>Oxidation;<br>C terminus amidation                                                                                                                                                       | $F_{2,9} = 1.799, P = 0.22$                   |
| Diuretic hormone 47 (DH <sub>47</sub> ) | EENPLFGRENEPMDREAMGYILPKLMPRY                                                                                                                                                                                                                                                                                                                    | C terminus amidation                                                                                                                                                                                                                                                                                   | $F_{2,9} = 2.543, P = 0.13$                   |
| FMRFamide (FMRFa)                       | DKGHFLRF<br>GDLPANYLEMEEGYDRPT<br>GNSDFLRF<br>NDNFMRF<br>PERNSNFLRF<br>STLYKNFARL<br>VLGDKSQFIRF                                                                                                                                                                                                                                                 | C terminus amidation<br>C terminus amidation<br>C terminus amidation<br>C terminus amidation<br>C terminus amidation<br>C terminus amidation<br>C terminus amidation                                                                                                                                   | $F_{2,9} = 13.002, P = 0.0022$                |
| IDL-like (IDL)                          | AMAPHPLLVSV<br>IDLSRLYGHL<br>IDLSRLYGHL<br>IDLSRLYGHLSS<br>IPHAVMAIDLRLYGH<br>IPHAVMAIDLRLYGHLS<br>IPHAVMAIDLRLYGHLS<br>ISIQYLCDGAPDCSDGYDEDSRLCTAAKR<br>LKPLGGVDKVAIALSESQTIED                                                                                                                                                                  | C terminus amidation<br><br>C terminus amidation<br>C terminus amidation<br><br>N terminus acetylation<br>N terminus acetylation                                                                                                                                                                       | $F_{2,9} = 0.890, P = 0.44$                   |
| Ion transport peptide (ITP)             | SPAQRMSPLLSHLS                                                                                                                                                                                                                                                                                                                                   |                                                                                                                                                                                                                                                                                                        |                                               |
| Myosuppressin (MYO)                     | AVAFIFVAMMASSNLSMASNLPLIYC<br>DGLQKRQLCFALLERMDAPQEVSNQVMDNQLYERGI<br>FVAMMASSNLSMASNL<br>FVAMMASSNLSMASNLPLI<br><br>LTVEDLVLMNQCTVYAVAFIFVAMMASSNLSMAS<br>QDVVDHVFLRF<br>RQLCFALLERMDAPQEVSNQV<br>VLVMNQCTVYAVAFI                                                                                                                               | Oxidation<br><br>Oxidation<br>N terminus acetylation;<br>Oxidation;<br>C terminus amidation<br>N terminus acetylation;<br>Oxidation<br>N terminus Pyroglutamination;<br>C terminus amidation<br>N terminus acetylation;<br>Oxidation<br>N terminus acetylation                                         | $F_{2,9} = 3.611, P = 0.071$                  |
| Myoinhibiting peptide (MIP)             | AAIDVGSDPDIGIPKESDEMQM<br>AAIDVGSDPDIGIPKESDEMQME<br>DPAWTLNKGIV<br>PEDEYAMKQLAT<br>SAVLVIVGAVICISMLPFSM<br><br>SEWGNFRGSW<br>VIVGAVICISMLPFSMQAAIDVGSDPDIGIPKE                                                                                                                                                                                  | Oxidation; C terminus amidation<br>C terminus amidation<br>C terminus amidation<br>N terminus acetylation<br>Oxidation; C terminus amidation<br>C terminus amidation<br>N terminus acetylation                                                                                                         | $F_{2,9} = 1.652, P = 0.25$                   |
| Natalisin (NTL)                         | CLGHCKFGGCVKRAARQDDMG                                                                                                                                                                                                                                                                                                                            |                                                                                                                                                                                                                                                                                                        | $F_{2,9} = 6.866, P = 0.016$                  |

| Neuropeptide gene            | Peptide                                                                                                                                                                                                                                                                                                                                                                              | Possible modifications observed                                                                                                                                                                                                                                                                                                                                                                           | Test of difference in neuropeptide abundances                                        |                                                                                                                                       |                              |                                                                                                                                                                   |                                                                                      |                              |                                                                                                             |                             |                                                                                       |                             |
|------------------------------|--------------------------------------------------------------------------------------------------------------------------------------------------------------------------------------------------------------------------------------------------------------------------------------------------------------------------------------------------------------------------------------|-----------------------------------------------------------------------------------------------------------------------------------------------------------------------------------------------------------------------------------------------------------------------------------------------------------------------------------------------------------------------------------------------------------|--------------------------------------------------------------------------------------|---------------------------------------------------------------------------------------------------------------------------------------|------------------------------|-------------------------------------------------------------------------------------------------------------------------------------------------------------------|--------------------------------------------------------------------------------------|------------------------------|-------------------------------------------------------------------------------------------------------------|-----------------------------|---------------------------------------------------------------------------------------|-----------------------------|
| Neuropeptide-like 1 (NPLP-1) | DEPEEIDPFFTAR<br>YIVLDESFFMAAR                                                                                                                                                                                                                                                                                                                                                       | N terminus acetylation;<br>Oxidation;<br>C terminus amidation<br>C terminus amidation<br>C terminus amidation                                                                                                                                                                                                                                                                                             | $F_{2,9} = 8.615, P = 0.0081$                                                        |                                                                                                                                       |                              |                                                                                                                                                                   |                                                                                      |                              |                                                                                                             |                             |                                                                                       |                             |
|                              | AGCLLLEAYGDSIAPE<br>AGYIRTLPEEDN<br>ANLAKNGQLPNYQND<br>ERDSGN<br>FLLOPAVDRILLQRLVLMQPR<br>FLLOPAVDRILLQRLVLMQPRN<br>FLLOPAVDRILLQRLVLMQPRNH<br>GIESLARNGEL<br>GIESLARNGELH<br>GIESLARNGELHN<br>GIESLARNGELHNKREIEDLI<br>GIESLARNGELHNKREIEDLIDELY<br>GIESLARNGELHNKREIEDLIDELYE<br>GKRSIANLAKNGQLPNYQND<br>HGPNDRSYDDMMKSDAERDSGNG<br>KESYDDYYRMAAF<br>LLLRASPAESIRGTSALWPDASAGCLLLE | C terminus amidation<br><br>Oxidation<br><br>C terminus amidation<br>C terminus amidation<br>C terminus amidation<br><br>N terminus acetylation<br>C terminus amidation<br>N terminus acetylation;<br>C terminus amidation<br>C terminus amidation<br>C terminus amidation<br>C terminus amidation<br><br>C terminus amidation<br>C terminus amidation<br>N terminus acetylation;<br>C terminus amidation |                                                                                      |                                                                                                                                       |                              |                                                                                                                                                                   |                                                                                      |                              |                                                                                                             |                             |                                                                                       |                             |
|                              | NIANLARSYSFPY<br>NLAALARAGYIRTLPEEDN<br>NLAALARAGYIRTLPEEDNG<br>NLAALARAGYIRTLPEEDNGKRSIANLAK<br>NLASIKAGYKQPF<br>NVAALLRQDKIHGPNDRSYDDMMKSDAERDSGNGD<br>NVAASLARGGNLLY<br>NVAASLARGGNLLYGKRNVAALLRQD                                                                                                                                                                                | C terminus amidation<br>C terminus amidation<br>N terminus acetylation;<br>C terminus amidation                                                                                                                                                                                                                                                                                                           |                                                                                      |                                                                                                                                       |                              |                                                                                                                                                                   |                                                                                      |                              |                                                                                                             |                             |                                                                                       |                             |
|                              | SIANLAKNGQLPNYQND<br>SIANLAKNGQLPNYQND<br>SIANLAKNGQLPNYQND<br>VDEMNNKESYDDYYRMAAF                                                                                                                                                                                                                                                                                                   | C terminus amidation<br>C terminus amidation<br>N terminus acetylation;<br>C terminus amidation                                                                                                                                                                                                                                                                                                           |                                                                                      |                                                                                                                                       |                              |                                                                                                                                                                   |                                                                                      |                              |                                                                                                             |                             |                                                                                       |                             |
|                              | YDDMMKSDAERDSGNGD<br>YIGSLARSSELNRF<br>YIGSLARSSELNRFHND                                                                                                                                                                                                                                                                                                                             | N terminus acetylation<br>C terminus amidation                                                                                                                                                                                                                                                                                                                                                            |                                                                                      |                                                                                                                                       |                              |                                                                                                                                                                   |                                                                                      |                              |                                                                                                             |                             |                                                                                       |                             |
|                              | Pheromone biosynthesis activating neuropeptide (PBAN)                                                                                                                                                                                                                                                                                                                                | AQLENYDKAITIYQDVAMSSLESSLLKYSAKE<br>HNKMNFTPL<br>KMSALVFGPRL<br>NPSSDELLKNTNLDREQLVALLEMLQESPWAVVALNE<br>TMAAKHHQSIAMYES                                                                                                                                                                                                                                                                                  |                                                                                      | C terminus amidation<br>C terminus amidation<br>C terminus amidation<br>N terminus acetylation;<br>Oxidation;<br>C terminus amidation | $F_{2,9} = 5.377, P = 0.029$ |                                                                                                                                                                   |                                                                                      |                              |                                                                                                             |                             |                                                                                       |                             |
|                              |                                                                                                                                                                                                                                                                                                                                                                                      | RYamide (RYa)                                                                                                                                                                                                                                                                                                                                                                                             |                                                                                      | ADKAAKTAGKHVIVAPR<br>ADKAAKTAGKHVIVAPRNDKFFLASRY<br>ALNRSQYN<br>ANDRPFMMGMRY<br>ASRYGKRSGGEMISNAAQAALVFPVPP<br>DAMKPSSELQDHLRCHP      |                              | C terminus amidation<br><br>C terminus amidation<br>Oxidation<br>N terminus acetylation;<br>Oxidation;<br>C terminus amidation<br>Oxidation; C terminus amidation |                                                                                      |                              |                                                                                                             |                             |                                                                                       |                             |
|                              |                                                                                                                                                                                                                                                                                                                                                                                      |                                                                                                                                                                                                                                                                                                                                                                                                           |                                                                                      | GGAAHQAVQLITRGMANSDDTESEDGIRRCW                                                                                                       |                              | C terminus amidation<br>Oxidation; C terminus amidation                                                                                                           |                                                                                      |                              |                                                                                                             |                             |                                                                                       |                             |
|                              |                                                                                                                                                                                                                                                                                                                                                                                      |                                                                                                                                                                                                                                                                                                                                                                                                           |                                                                                      | LNAVLEFYIGTVEA<br>MKPSEL<br>MMTDAMSESKKCRQY                                                                                           |                              | C terminus amidation<br>C terminus amidation<br>N terminus acetylation;<br>Oxidation                                                                              |                                                                                      |                              |                                                                                                             |                             |                                                                                       |                             |
|                              |                                                                                                                                                                                                                                                                                                                                                                                      |                                                                                                                                                                                                                                                                                                                                                                                                           |                                                                                      | NDKFFLASRY                                                                                                                            |                              | C terminus amidation                                                                                                                                              |                                                                                      |                              |                                                                                                             |                             |                                                                                       |                             |
|                              |                                                                                                                                                                                                                                                                                                                                                                                      |                                                                                                                                                                                                                                                                                                                                                                                                           |                                                                                      | Tachykinin (TK)                                                                                                                       |                              | APNGFFGMR                                                                                                                                                         | Oxidation; C terminus amidation                                                      | $F_{2,9} = 5.882, P = 0.023$ |                                                                                                             |                             |                                                                                       |                             |
|                              |                                                                                                                                                                                                                                                                                                                                                                                      |                                                                                                                                                                                                                                                                                                                                                                                                           |                                                                                      |                                                                                                                                       |                              | DLETVLLPEES<br>ESKRAPNGFFGMR<br>PSGFTGVRGKKSFEDEDFEMR                                                                                                             | C terminus amidation<br>N terminus acetylation;<br>Oxidation<br>C terminus amidation |                              |                                                                                                             |                             |                                                                                       |                             |
|                              |                                                                                                                                                                                                                                                                                                                                                                                      |                                                                                                                                                                                                                                                                                                                                                                                                           |                                                                                      |                                                                                                                                       |                              | PSRSAGFFGMR<br>SFEDEDFEMRDIED<br>YPYEFRGKFGV<br>YPYEFRGKFGVGR                                                                                                     | C terminus amidation                                                                 |                              |                                                                                                             |                             |                                                                                       |                             |
|                              |                                                                                                                                                                                                                                                                                                                                                                                      |                                                                                                                                                                                                                                                                                                                                                                                                           |                                                                                      |                                                                                                                                       |                              | Short neuropeptide F (sNPF)                                                                                                                                       | LRFRRSDPSLIQASPYMLSAQAQDAE<br>SDPSLIQASPYMLSAQAQDAEIAN                               |                              | C terminus amidation                                                                                        | $F_{2,9} = 2.074, P = 0.18$ |                                                                                       |                             |
|                              |                                                                                                                                                                                                                                                                                                                                                                                      |                                                                                                                                                                                                                                                                                                                                                                                                           |                                                                                      |                                                                                                                                       |                              |                                                                                                                                                                   | SIFamide (SIFa)                                                                      |                              | SAMCEI                                                                                                      |                             | N terminus acetylation;<br>Oxidation;<br>C terminus Amidation<br>C terminus amidation | $F_{2,9} = 0.297, P = 0.75$ |
| TYRKPPFNGSIF                 |                                                                                                                                                                                                                                                                                                                                                                                      |                                                                                                                                                                                                                                                                                                                                                                                                           | C terminus amidation                                                                 |                                                                                                                                       |                              |                                                                                                                                                                   |                                                                                      |                              |                                                                                                             |                             |                                                                                       |                             |
| Sulfakinin (SK)              |                                                                                                                                                                                                                                                                                                                                                                                      |                                                                                                                                                                                                                                                                                                                                                                                                           | EDFDDYGHLY<br>GPAGASVPTANRRI<br>MKLLLVAMCLILMACNDGASAGPAGASVPTANRRIRS<br>QNSDDYGHLYR |                                                                                                                                       |                              |                                                                                                                                                                   |                                                                                      |                              | C terminus amidation<br><br>Oxidation<br>N terminus Pyroglutamination;<br>C terminus Amidation<br>Oxidation |                             | $F_{2,9} = 8.756, P = 0.0077$                                                         |                             |
|                              |                                                                                                                                                                                                                                                                                                                                                                                      |                                                                                                                                                                                                                                                                                                                                                                                                           | QTYFMMKLLLVAMCLILMACNDGASAGPAGASVPTANRRIRS                                           |                                                                                                                                       |                              |                                                                                                                                                                   |                                                                                      |                              | Oxidation                                                                                                   |                             |                                                                                       |                             |

All presented are the results of ANOVA for differences in the abundance of that neuropeptide in different behavioural states.
